# Supplementary material for: The quercetin metabolite 4-methylcatechol causes vasodilation via voltage-gated potassium (KV) channels
Source: Royal Society of Chemistry journal article supplement (doi:10.1039/d3fo04672a), 2024-01-01
Supplement: d3fo04672a1.pdf [file d3fo04672a1.pdf]

# The quercetin metabolite 4-methylcatechol causes vasodilation via voltage-gated potassium ( $K_V$ ) channels

**Patrícia Dias, Rudy Salam, Jana Pourová, Marie Vopršalová, Lukáš Konečný, Eduard  
Jirkovský, Jurjen Duintjer Tebbens & Přemysl Mladěnka\***

Charles University, Faculty of Pharmacy, Czech Republic

## **Supplementary data**

**10 pages**

\*correspondence to: [mladenkap@faf.cuni.cz](mailto:mladenkap@faf.cuni.cz) (P.M.) Department of Pharmacology and Toxicology, Faculty of Pharmacy in Hradec Králové, Charles University, Heyrovského 1203, 500 05 Hradec Králové, Czech Republic, Tel: +420 495 067 295, Fax: +420 495 067 170

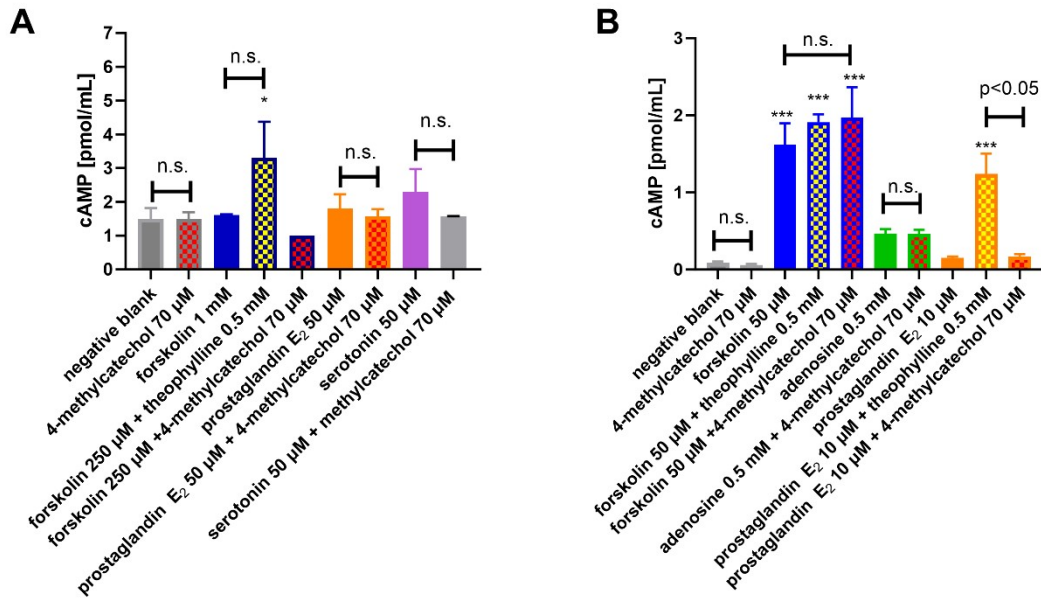

**Fig. S1. Impact of 4-methylcatechol on cAMP levels. A:** rat smooth muscle cells A-10 and **B:** human platelets. Data are shown as mean  $\pm$  SEM from at least 4 measurements. \*  $p < 0.05$  vs. negative blank, \*\*\*  $p < 0.001$  vs. negative blank.

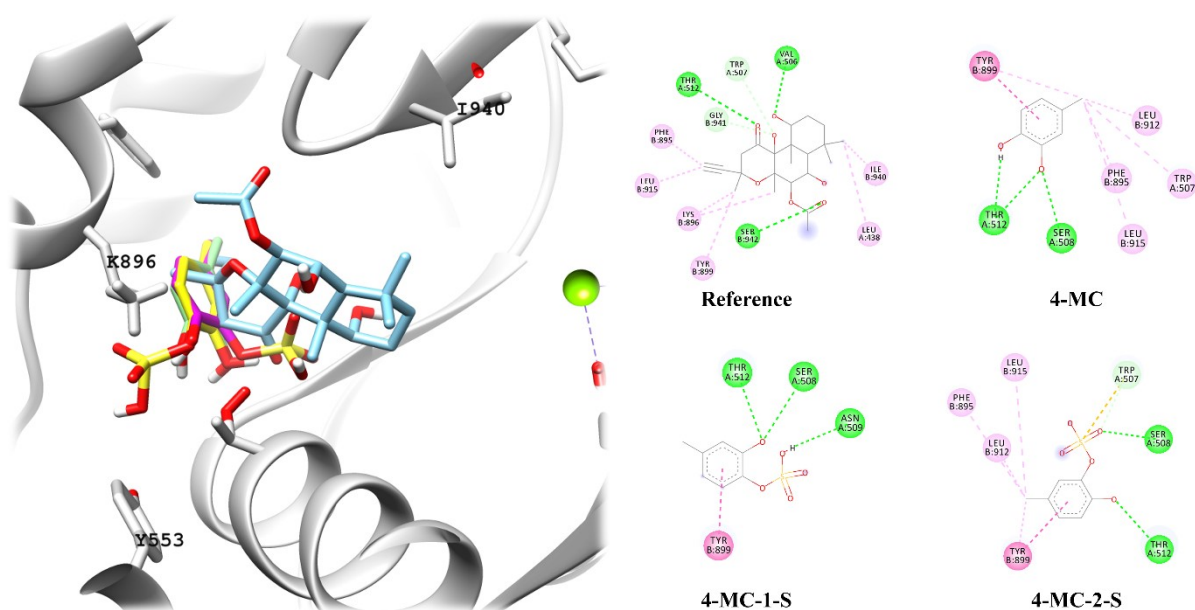

**Fig. S2.** Docking pose of forskolin/reference (turquoise); 4-methylcatechol (4-MC, green); 4-methylcatechol-1-sulfate (4-MC-1-S, yellow); 4-methylcatechol-2-sulfate (4-MC-2-S, purple) in the ligand binding domain of adenylate cyclase (AC, PDB ID: 1CJK) and 2D representation of molecular interactions between ligands and adenylate cyclase.

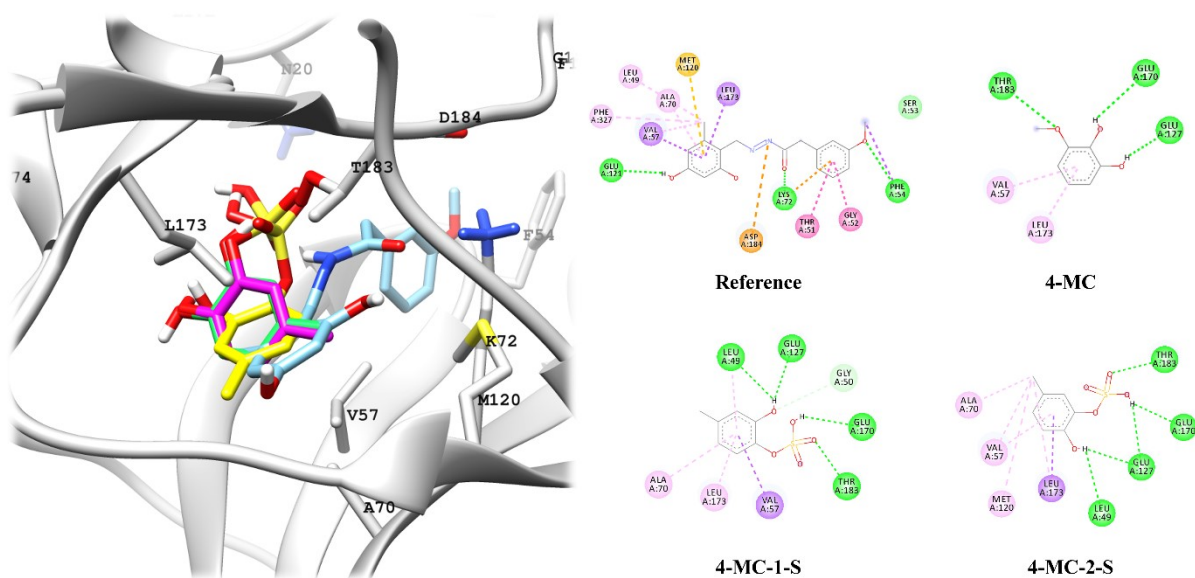

**Fig. S3.** Docking pose of the activator S69/reference (turquoise); 4-methylcatechol (4-MC, green); 4-methylcatechol-1-sulfate (4-MC-1-S, yellow); 4-methylcatechol-2-sulfate (4-MC-2-S, purple) in the ligand binding domain of human protein kinase A (PKA, PDB ID: 3POO) and 2D representation of molecular interactions between ligands and protein kinase A.

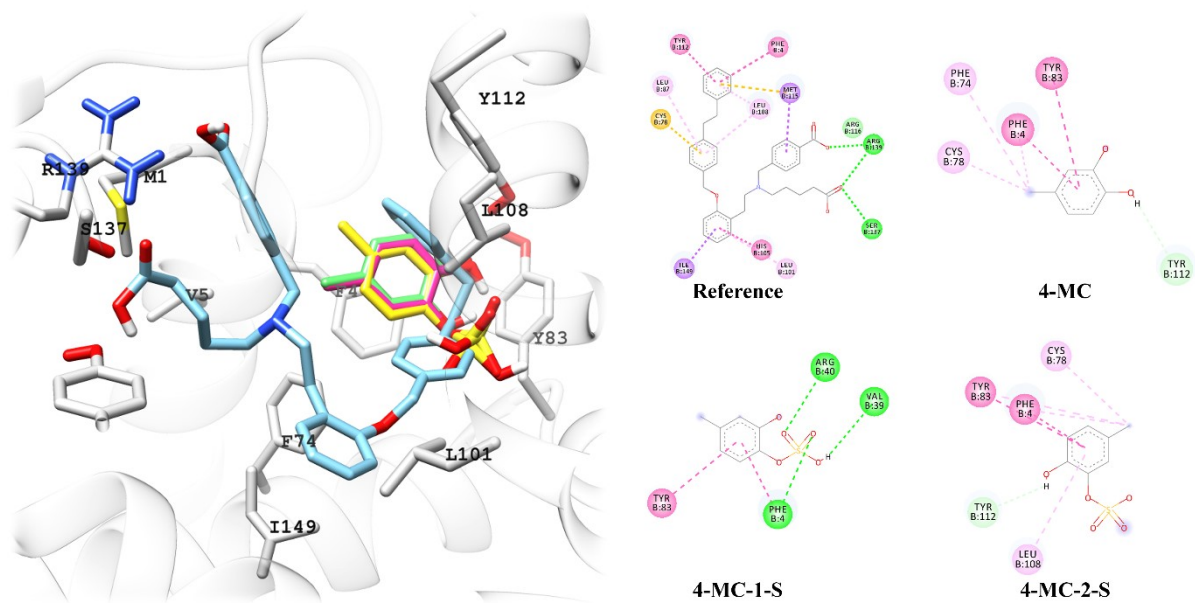

**Fig. S4.** Docking pose of cinaciguat/reference (turquoise); 4-methylcatechol (4-MC, green); 4-methylcatechol-1-sulfate (4-MC-1-S, yellow); 4-methylcatechol-2-sulfate (4-MC-2-S, purple) in the ligand binding domain of human soluble guanylate cyclase (sGC, PDB ID: 7D9T) and 2D representation of molecular interactions between ligands and sGC.

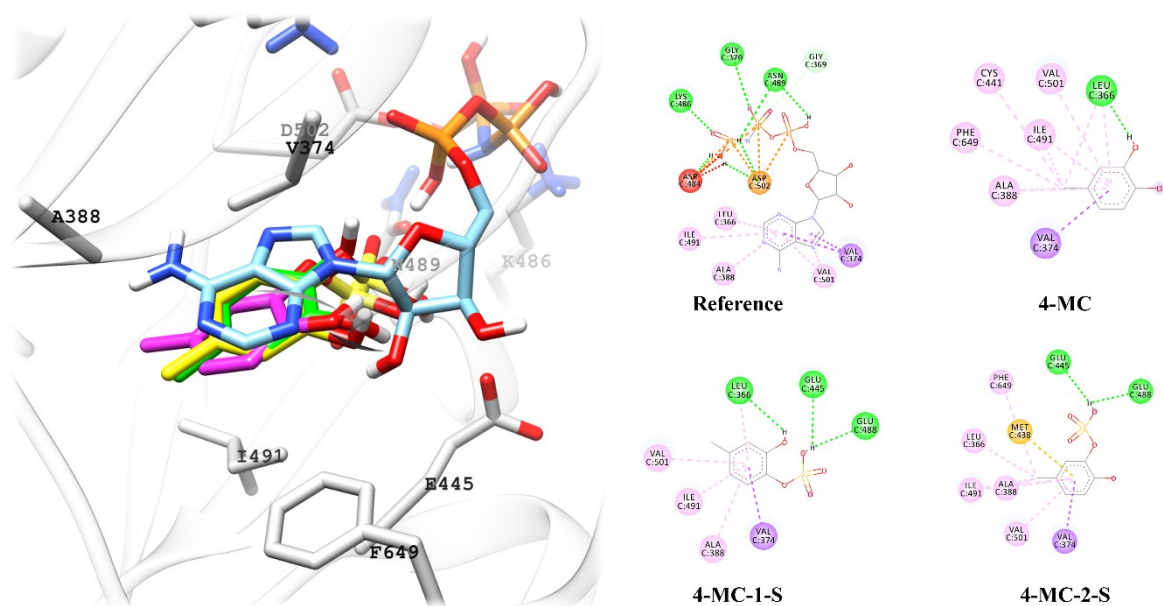

**Fig. S5.** Docking pose of the activator ANP/reference (turquoise); 4-methylcatechol (4-MC, green); 4-methylcatechol-1-sulfate (4-MC-1-S, yellow); 4-methylcatechol-2-sulfate (4-MC-2-S, purple) in the ligand binding domain of human protein kinase G (PKG)-Iα (PDB ID: 6C0T) and 2D representation of molecular interactions between ligands and PKGIα.

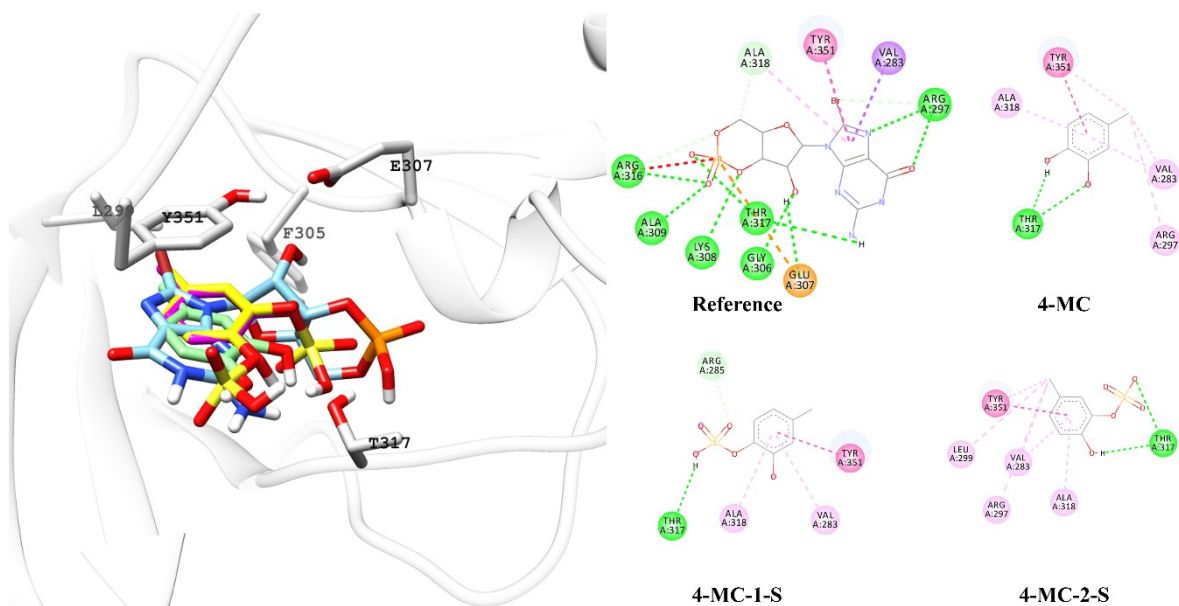

**Fig. S6.** Docking pose of the activator 8-Br-cGMP/reference (turquoise); 4-methylcatechol (4-MC, green); 4-methylcatechol-1-sulfate (4-MC-1-S, yellow); 4-methylcatechol-2-sulfate (4-MC-2-S, purple) in the ligand binding domain of human protein kinase G (PKG)-I $\beta$  (PDB ID: 5JAX) and 2D representation of molecular interactions between ligands and PKGI $\beta$ .

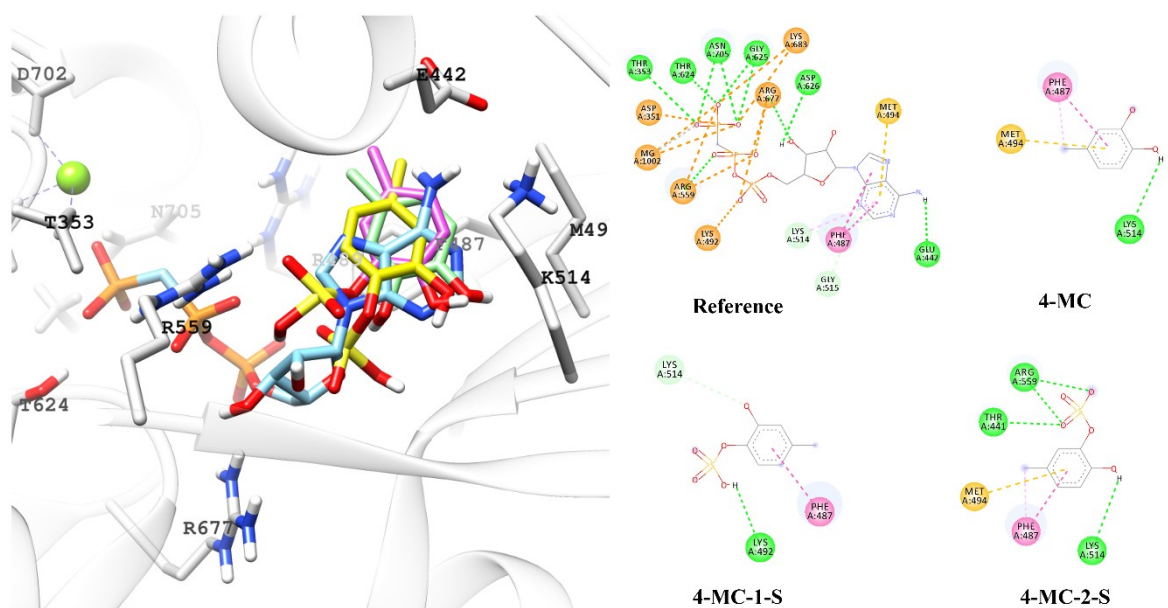

**Fig. S7.** Docking pose of the activator AMP-PCP/reference (turquoise); 4-methylcatechol (4-MC, green); 4-methylcatechol-1-sulfate (4-MC-1-S, yellow); 4-methylcatechol-2-sulfate (4-MC-2-S, purple) in the ligand binding domain of human sarco/endoplasmic calcium ATPase (SERCA, PDB ID: 6JJU) and 2D representation of molecular interactions between ligands and SERCA

**Table S1.** Docking scores and ligand efficiency (LE) of reference, 4-methylcatechol (4-MC), 4-methylcatechol-1-sulfate (4-MC-1S) and 4-methylcatechol-2-sulfate (4-MC-2S) for each target protein.

| PDB ID | Target protein | Docking score (kcal/mol) |      |          |          | Ligand efficiency (docking score/heavy atom) |      |          |          |
|--------|----------------|--------------------------|------|----------|----------|----------------------------------------------|------|----------|----------|
|        |                | Reference                | 4-MC | 4-MC-1-S | 4-MC-2-S | Reference                                    | 4-MC | 4-MC-1-S | 4-MC-2-S |
| 7D9T   | sGC            | -10.7                    | -5.3 | -5.9     | -5.9     | 0.25                                         | 0.59 | 0.45     | 0.45     |
| 6C0T   | PKGI $\alpha$  | -8.2                     | -6.5 | -6.6     | -6.5     | 0.31                                         | 0.72 | 0.51     | 0.50     |
| 5JAX   | PKGI $\beta$   | -11.6                    | -5.8 | -5.7     | -7.0     | 0.48                                         | 0.64 | 0.44     | 0.54     |
| 3POO   | PKA            | -9.3                     | -5.9 | -6.8     | -6.8     | 0.40                                         | 0.66 | 0.52     | 0.52     |
| 7TCI   | K $v$ 7.1      | -8.8                     | -6.0 | -6.0     | -6.4     | 0.28                                         | 0.67 | 0.46     | 0.49     |
| 7CR1   | K $v$ 7.2      | -8.1                     | -6.1 | -5.9     | -6.3     | 0.37                                         | 0.68 | 0.45     | 0.48     |
| 7BYM   | K $v$ 7.4      | -7.6                     | -6.0 | -5.8     | -6.1     | 0.35                                         | 0.67 | 0.45     | 0.47     |
| 1CJK   | AC             | -9.7                     | -5.6 | -6.2     | -6.3     | 0.33                                         | 0.62 | 0.48     | 0.48     |
| 6JJU   | SERCA          | -9.7                     | -5.5 | -6.0     | -6.5     | 0.31                                         | 0.61 | 0.46     | 0.50     |

PDB ID, Protein Data Bank Identifiers; sGC, soluble guanylate cyclase; PKGI $\alpha$ , protein kinase G isoform I $\alpha$ ; PKGI $\beta$ , protein kinase G isoform I $\beta$ ; PKA, protein kinase A; K $v$ , voltage-gated potassium channel; AC, adenylate cyclase; SERCA, sarco/endoplasmic reticulum calcium-ATPase.

**Table S2. Intermolecular interactions of reference ligands (RL) and 4-MC with target proteins.**

| Ligand                                            | Conventional hydrogen bonds                                                                                                       | Carbon hydrogen bond | Pi-Pi Stacked   | Pi-Sulfur                         | Pi-Alkyl                                                                                    | Pi-sigma                                              | Pi-Pi T-Shaped                   | Other interactions                                                                                            |
|---------------------------------------------------|-----------------------------------------------------------------------------------------------------------------------------------|----------------------|-----------------|-----------------------------------|---------------------------------------------------------------------------------------------|-------------------------------------------------------|----------------------------------|---------------------------------------------------------------------------------------------------------------|
| <b>soluble Guanylate Cyclase (sGC)</b>            |                                                                                                                                   |                      |                 |                                   |                                                                                             |                                                       |                                  |                                                                                                               |
| cinaciguat (RL)                                   | SER137 (2.96 Å)<br>ARG139 (3.05 Å)<br>ARG139 (2.87 Å)                                                                             |                      | TYR112 (3.87 Å) | CYS78 (4.20 Å)<br>MET115 (4.93 Å) | LEU101 (5.10 Å)<br>LEU87 (5.41 Å)<br>LEU108 (5.40 Å)<br>LEU108 (5.19 Å)                     | MET115 (3.73 Å)<br>ILE149 (3.72 Å)                    | PHE4 (5.15 Å)<br>HIS105 (4.90 Å) |                                                                                                               |
| 4-MC                                              |                                                                                                                                   | TYR112 (2.90 Å)      | TYR83 (3.72 Å)  |                                   | PHE4 (4.43 Å)<br>PHE74 (5.09 Å)                                                             |                                                       | TYR83 (5.28 Å)                   | Alkyl:<br>CYS78 (4.13 Å)                                                                                      |
| 4-MC-1-S                                          | PHE4 (3.07 Å)<br>ARG40 (2.62 Å)<br>VAL39 (2.89 Å)                                                                                 |                      | PHE4 (3.75 Å)   |                                   |                                                                                             |                                                       | TYR83 (5.19 Å)                   |                                                                                                               |
| 4-MC-2-S                                          |                                                                                                                                   | TYR112 (2.51 Å)      | PHE4 (4.25 Å)   |                                   | PHE4 (4.29 Å)<br>TYR83 (4.36 Å)<br>LEU108 (5.44 Å)                                          |                                                       | TYR83 (5.19 Å)                   | Alkyl:<br>CYS78 (4.16 Å)                                                                                      |
| <b>Protein kinase G (PKGI<math>\alpha</math>)</b> |                                                                                                                                   |                      |                 |                                   |                                                                                             |                                                       |                                  |                                                                                                               |
| ANP (RL)                                          | GLY370 (3.12 Å)<br>LYS486 (2.31 Å)<br>ASN489 (2.84 Å)<br>ASN489 (2.43 Å)<br>ASP502 (2.11 Å)<br>ASP484 (2.94 Å)<br>ASP502 (1.82 Å) | GLY369 (3.79 Å)      |                 |                                   | VAL501 (4.65 Å)<br>LEU366 (4.76 Å)<br>ALA388 (4.58 Å)<br>ILE491 (5.11 Å)<br>VAL501 (5.31 Å) | VAL374 (3.90 Å)<br>VAL374 (3.52 Å)<br>VAL374 (3.48 Å) |                                  | Electrostatic:<br>ASP502 (3.97 Å)<br>ASP484 (5.34 Å)<br>ASP502 (3.76 Å)<br>ASP484 (2.49 Å)<br>ASP502 (2.82 Å) |
| 4-MC                                              | LEU366 (2.67 Å)                                                                                                                   |                      |                 |                                   | PHE649 (5.42 Å)<br>LEU366 (5.10 Å)<br>ALA388 (5.12 Å)<br>ILE491 (4.87 Å)<br>VAL501 (5.03 Å) | VAL374 (3.90 Å)                                       |                                  | Alkyl:<br>LEU366 (4.56 Å)<br>CYS441 (4.89 Å)<br>ILE491 (4.33 Å)                                               |
| 4-MC-1-S                                          | GLU445 (2.54 Å)<br>GLU488 (2.20 Å)<br>LEU366 (2.70 Å)                                                                             |                      |                 |                                   | LEU366 (4.93 Å)<br>ALA388 (4.95 Å)<br>ILE491 (4.84 Å)<br>VAL501 (5.14 Å)                    | VAL374 (3.85 Å)                                       |                                  |                                                                                                               |
| 4-MC-2-S                                          | GLU445 (2.33 Å)<br>GLU488 (2.27 Å)                                                                                                |                      |                 | MET438 (5.62 Å)                   | PHE649 (5.03 Å)<br>ALA388 (4.56 Å)<br>ILE491 (4.84 Å)<br>VAL501 (4.49 Å)                    | VAL374 (3.92 Å)                                       |                                  | Alkyl:<br>ALA388 (4.20 Å)<br>LEU366 (4.21 Å)                                                                  |

| Ligand                                           | Conventional hydrogen bonds                                                                                                                                                                | Carbon hydrogen bond                                                     | Pi-Pi Stacked   | Pi-Sulfur                          | Pi-Alkyl                                                | Pi-sigma        | Pi-Pi T-Shaped                                        | Other interactions                                               |
|--------------------------------------------------|--------------------------------------------------------------------------------------------------------------------------------------------------------------------------------------------|--------------------------------------------------------------------------|-----------------|------------------------------------|---------------------------------------------------------|-----------------|-------------------------------------------------------|------------------------------------------------------------------|
| <b>Protein kinase G (PKGI<math>\beta</math>)</b> |                                                                                                                                                                                            |                                                                          |                 |                                    |                                                         |                 |                                                       |                                                                  |
| 8-Br-cGMP (RL)                                   | ARG297 (2.34 Å)<br>ARG297 (2.40 Å)<br>GLY306 (2.05 Å)<br>LYS308 (2.59 Å)<br>ALA309 (2.14 Å)<br>ARG316 (2.20 Å)<br>THR317 (2.03 Å)<br>THR317 (1.86 Å)<br>THR317 (1.88 Å)<br>GLU307 (2.08 Å) | ARG297 (3.68 Å)<br>ARG316 (3.58 Å)<br>ARG316 (3.51 Å)<br>ALA318 (3.47 Å) | TYR351 (3.75 Å) |                                    | ALA318 (4.98 Å)                                         | VAL283 (3.80 Å) |                                                       | Electrostatic:<br>Glu307 (5.48 Å)                                |
| 4-MC                                             | THR317 (2.49 Å)<br>THR317 (2.32 Å)                                                                                                                                                         |                                                                          | TYR351 (3.98 Å) |                                    | TYR351 (4.39 Å)<br>VAL283 (4.99 Å)<br>ALA318 (4.18 Å)   |                 |                                                       | Alkyl:<br>VAL283 (3.74 Å)<br>ARG297 (5.07 Å)                     |
| 4-MC-1-S                                         | THR317 (2.70 Å)                                                                                                                                                                            | ARG285 (3.34 Å)                                                          | TYR351 (3.91 Å) |                                    | VAL283 (4.66 Å)<br>ALA318 (4.69 Å)                      |                 |                                                       |                                                                  |
| 4-MC-2-S                                         | THR317 (2.42 Å)<br>THR317 (2.28 Å)<br>THR317 (2.40 Å)                                                                                                                                      |                                                                          | TYR351 (3.97 Å) |                                    | TYR351 (4.78 Å)<br>VAL283 (4.66 Å)<br>ALA318 (4.63 Å)   |                 |                                                       | Alkyl:<br>VAL 283 (3.94 Å)<br>ARG297 (4.98 Å)<br>LEU299 (4.40 Å) |
| <b>Voltage-gated potassium channels (Kv7.1)</b>  |                                                                                                                                                                                            |                                                                          |                 |                                    |                                                         |                 |                                                       |                                                                  |
| ML277 (RL)                                       | GLY262 (3.09 Å)<br>PHE325 (2.08 Å)                                                                                                                                                         |                                                                          | PHE325 (5.44 Å) | TRP238 (5.53 Å)<br>PHE329 (5.03 Å) | LEU261 (4.95 Å)<br>LEU 252 (5.21 Å)                     | PHE265 (3.87 Å) | PHE265 (5.02 Å)<br>TRP238 (5.30 Å)<br>PHE329 (4.73 Å) |                                                                  |
| 4-MC                                             | SER328 (2.60 Å)<br>SER328 (2.27 Å)<br>PHE330 (2.17 Å)                                                                                                                                      |                                                                          |                 |                                    | VAL324 (5.29 Å);<br>LEU256 (5.27 Å);<br>PRO333 (3.91 Å) | PHE330 (3.70 Å) |                                                       | Alkyl:<br>LEU256 (5.00 Å)                                        |
| 4-MC-1-S                                         | SER328 (2.15 Å)<br>PHE330 (2.73 Å)                                                                                                                                                         |                                                                          |                 |                                    | VAL324 (5.42 Å)<br>LEU256 (5.05 Å)<br>PRO333 (3.94 Å)   | VAL324 (3.63 Å) |                                                       |                                                                  |
| 4-MC-2-S                                         | LEU252 (2.59 Å)<br>VAL324 (2.03 Å)                                                                                                                                                         |                                                                          |                 |                                    | VAL324 (5.27 Å)<br>LEU256 (5.08 Å)<br>PRO333 (4.04 Å)   | PHE330 (3.64 Å) |                                                       |                                                                  |



| Ligand                                          | Conventional hydrogen bonds                                                                 | Carbon hydrogen bond                 | Pi-Pi Stacked                       | Pi-Sulfur       | Pi-Alkyl                                                                 | Pi-sigma                           | Pi-Pi T-Shaped  | Other interactions                                              |
|-------------------------------------------------|---------------------------------------------------------------------------------------------|--------------------------------------|-------------------------------------|-----------------|--------------------------------------------------------------------------|------------------------------------|-----------------|-----------------------------------------------------------------|
| <b>Voltage-gated potassium channels (Kv7.2)</b> |                                                                                             |                                      |                                     |                 |                                                                          |                                    |                 |                                                                 |
| retigabine (RL)                                 | TRP236 (3.35 Å)<br>PHE305 (2.31 Å)<br>SER303 (2.48 Å)<br>LEU299 (2.11 Å)<br>SER303 (2.91 Å) | SER 303 (3.12 Å);<br>PHE305 (2.45 Å) | TRP236 (4.72 Å);<br>GLY239 (4.79 Å) |                 | PRO308 (4.76 Å);<br>LEU299 (4.84 Å)                                      | PHE304 (3.84 Å)                    | TRP236 (5.12 Å) | LEU299 (4.73 Å)                                                 |
| 4-MC                                            | PHE240 (2.98 Å)<br>ALA235 (2.70 Å)<br>TRP236 (2.58 Å)                                       |                                      | PHE305 (3.86 Å)                     |                 | PHE305 (4.80 Å)<br>LEU299 (5.28 Å)                                       |                                    |                 |                                                                 |
| 4-MC-1-S                                        | TRP236 (2.60 Å)<br>ALA235 (2.80 Å)                                                          | GLY239 (3.78 Å)                      | PHE305 (4.05 Å)                     |                 | LEU299 (4.90 Å)                                                          |                                    | TRP236 (4.05 Å) |                                                                 |
| 4-MC-2-S                                        | TRP236 (2.47 Å)<br>TRP236 (2.51 Å)<br>ALA235 (2.75 Å)                                       |                                      | PHE305 (3.87 Å)                     |                 | PHE305 (4.89 Å)<br>PRO308 (5.45 Å)<br>LEU299 (5.36 Å)                    |                                    | TRP236 (5.11 Å) | Alkyl:<br>LEU299 (4.73 Å)                                       |
| <b>Voltage-gated potassium channels (Kv7.4)</b> |                                                                                             |                                      |                                     |                 |                                                                          |                                    |                 |                                                                 |
| retigabine (RL)                                 | TRP242 (2.22 Å)<br>PHE311 (2.97 Å)<br>LEU305 (2.80 Å)<br>SER309 (2.49 Å)                    | TRP242 (3.61 Å)                      | TRP242 (4.42 Å)                     |                 | PRO314 (4.95 Å)<br>LEU305 (4.79 Å)                                       | LEU305 (3.82 Å)<br>PHE310 (3.71 Å) | PHE246 (5.21 Å) |                                                                 |
| 4-MC                                            | PHE246 (2.90 Å)<br>ALA241 (2.72 Å)                                                          |                                      | PHE311 (4.18 Å)<br>TRP242 (4.75 Å)  |                 | TRP242 (5.29 Å)<br>PRO314 (5.29 Å)<br>LEU305 (5.29 Å)                    |                                    |                 | Alkyl:<br>PRO314 (3.90 Å)                                       |
| 4-MC-1-S                                        | PHE246 (2.84 Å)<br>TRP242 (2.47 Å)                                                          |                                      | PHE311 (4.56 Å)                     |                 | LEU305 (4.53 Å)                                                          |                                    | TRP242 (4.81 Å) |                                                                 |
| 4-MC-2-S                                        | PHE246 (2.85 Å)<br>TRP242 (2.64 Å)                                                          |                                      | PHE311 (4.11 Å)                     |                 | TRP242 (5.28 Å)<br>PRO314 (5.36 Å)<br>LEU305 (5.27 Å)                    |                                    | TRP242 (4.81 Å) | Alkyl:<br>PRO314 (4.00 Å)                                       |
| <b>adenylyl cyclase (AC)</b>                    |                                                                                             |                                      |                                     |                 |                                                                          |                                    |                 |                                                                 |
| forskolin (RL)                                  | THR512 (3.12 Å)<br>SER942 (3.29 Å)<br>VAL506 (3.02 Å)                                       | TRP507 (3.71 Å)<br>GLY941 (3.72 Å)   |                                     |                 | PHE895 (4.63 Å)<br>TYR899 (4.26 Å)<br>LEU438 (5.00 Å)<br>ILE940 (5.13 Å) |                                    |                 | Alkyl:<br>LEU915 (5.21 Å)<br>LYS896 (4.79 Å)<br>LYS896 (4.58 Å) |
| 4-MC                                            | SER508 (3.34 Å)<br>THR512 (2.24 Å)<br>THR512 (2.10 Å)                                       |                                      | TYR899 (3.87 Å)                     |                 | TRP507 (5.05 Å)<br>PHE895 (4.85 Å)<br>PHE895 (4.36 Å)                    |                                    |                 | Alkyl:<br>LEU912 (4.55 Å)<br>LEU912 (5.30 Å)                    |
| 4-MC-1-S                                        | SER508 (2.71 Å)<br>THR512 (2.49 Å)<br>ASN509 (2.17 Å)                                       |                                      | TYR899 (3.98 Å)                     |                 |                                                                          |                                    |                 |                                                                 |
| 4-MC-2-S                                        | SER508 (2.30 Å)<br>THR512 (2.63 Å)                                                          | TRP507 (2.98 Å)                      | TYR899 (4.05 Å)                     | TRP507 (5.80 Å) | PHE895 (4.75 Å)<br>TYR899 (4.07 Å)                                       |                                    |                 | Alkyl:<br>LEU912 (4.46 Å)<br>LEU915 (5.40 Å)                    |

(continued)

| Ligand                                                    | Conventional hydrogen bonds                                                                                                                                                                | Carbon hydrogen bond               | Pi-Pi Stacked                      | Pi-Sulfur       | Pi-Alkyl                                             | Pi-sigma                                                              | Pi-Pi T-Shaped  | Other interactions                                                                                                                                                                     |
|-----------------------------------------------------------|--------------------------------------------------------------------------------------------------------------------------------------------------------------------------------------------|------------------------------------|------------------------------------|-----------------|------------------------------------------------------|-----------------------------------------------------------------------|-----------------|----------------------------------------------------------------------------------------------------------------------------------------------------------------------------------------|
| <b>sarco/endoplasmic reticulum calcium ATPase (SERCA)</b> |                                                                                                                                                                                            |                                    |                                    |                 |                                                      |                                                                       |                 |                                                                                                                                                                                        |
| AMP-PCP (RL)                                              | THR353 (3.05 Å)<br>ARG559 (3.23 Å)<br>THR624 (3.01 Å)<br>GLY625 (3.26 Å)<br>GLY625 (3.11 Å)<br>ARG677 (3.14 Å)<br>ASN705 (3.02 Å)<br>ASN705 (3.22 Å)<br>ASP626 (3.03 Å)<br>GLU442 (2.26 Å) | GLY515 (3.38 Å)<br>LYS514 (3.36 Å) | PHE487 (4.07 Å)<br>PHE487 (4.45 Å) | MET494 (5.50 Å) | LYS514 (4.98 Å)                                      |                                                                       |                 | Salt bridge:<br>ARG559 (3.38 Å)<br>LYS683 (3.37 Å)<br>Electrostatic:<br>LYS492 (4.30 Å)<br>ARG559 (5.49 Å)<br>ARG677 (4.45 Å)<br>ARG677 (4.70 Å)<br>LYS683 (4.62 Å)<br>ASP351 (3.75 Å) |
| 4-MC                                                      | LYS 514 (2.77 Å)                                                                                                                                                                           |                                    | PHE487 (3.75 Å)                    | MET494 (5.13 Å) | PHE487 (4.37 Å)                                      |                                                                       |                 |                                                                                                                                                                                        |
| 4-MC-1-S                                                  | LYS492 (2.57 Å)                                                                                                                                                                            | LYS514 (3.73 Å)                    | PHE487 (4.06 Å)                    |                 |                                                      |                                                                       |                 |                                                                                                                                                                                        |
| 4-MC-2-S                                                  | THR441 (2.34 Å)<br>ARG559 (2.27 Å)<br>ARG559 (2.04 Å)<br>ARG559 (2.41 Å)<br>LYS514 (3.02 Å)                                                                                                |                                    | PHE487 (3.73 Å)                    | MET494 (5.23 Å) | PHE487 (4.67 Å)                                      |                                                                       |                 |                                                                                                                                                                                        |
| <b>Protein Kinase A (PKA)</b>                             |                                                                                                                                                                                            |                                    |                                    |                 |                                                      |                                                                       |                 |                                                                                                                                                                                        |
| S69 (RL)                                                  | PHE54 (3.25 Å)<br>LYS72 (3.07 Å)<br>GLU121 (2.73 Å)                                                                                                                                        |                                    |                                    | MET120 (5.92 Å) | PHE327 (5.00 Å)<br>ALA70 (3.92 Å)<br>LYS722 (4.84 Å) | VAL57 (3.97 Å)<br>LYS72 (3.54 Å)<br>LEU173 (3.40 Å)<br>PHE54 (3.96 Å) |                 | Electrostatic:<br>ASP184 (5.09 Å)<br><br>Pi-cation: LYS72 (4.09 Å)<br><br>Amide Pi-stacked:<br>THR51 (4.00 Å)<br>GLY52 (4.50 Å)                                                        |
| 4-MC                                                      | GLU127 (2.66 Å)<br>GLU170 (2.99 Å)<br>LEU49 (2.71 Å)                                                                                                                                       |                                    |                                    |                 | VAL57 (4.55 Å)                                       |                                                                       | LEU173 (3.97 Å) | Alkyl:<br>ALA70 (4.36 Å)<br>VAL57 (4.33 Å)<br>MET120 (4.93 Å)<br>LEU173 (5.11 Å)                                                                                                       |
| 4-MC-1-S                                                  | THR183 (2.03 Å)<br>GLU170 (2.04 Å)<br>LEU49 (2.93 Å)<br>GLU127 (2.84 Å)                                                                                                                    | GLY50 (3.44 Å)                     |                                    |                 | LEU49 (5.38 Å)<br>ALA70 (5.21 Å)<br>LEU173 (4.78 Å)  | VAL57 (3.94 Å)                                                        |                 |                                                                                                                                                                                        |
| 4-MC-2-S                                                  | THR183 (2.30 Å)<br>GLU127 (2.74 Å)<br>GLU170 (2.32 Å)<br>LEU49 (2.87 Å)<br>GLU127 (2.66 Å)                                                                                                 |                                    |                                    |                 | VAL57 (4.50 Å)                                       | LEU173 (3.87 Å)                                                       |                 | Alkyl:<br>ALA70 (4.09 Å)<br>VAL57 (4.32 Å)<br>MET120 (4.77 Å)<br>LEU173 (5.23 Å)                                                                                                       |
